# Supplementary material for: Draft genome sequence of Bacillus azotoformans MEV2011, a (Co-) denitrifying strain unable to grow with oxygen
Source: PubMed Central journal article supplement (PMC4322954; doi:10.1186/1944-3277-9-23), 2015-01-21
Supplement: 1944-3277-9-23-S1.pdf [file 1944-3277-9-23-S1.pdf]

**Maja Nielsen, Lars Schreiber, Kai Finster, and Andreas Schramm:**Draft Genome Sequence of *Bacillus azotoformans* MEV2011, a (Co-) Denitrifying Strain Unable to Grow with Oxygen**Supplementary Tables****Table S1.** Overview of the genomic inventory for dissimilatory nitrogen transformations in *Bacillus azotoformans* MEV2011 (according to the IMG autoannotation).

| Function                                          | Gene         | Locus Tag  | Gene Coordinates        | GenBank Identifier (pBLAST best hit)                         | % ID |
|---------------------------------------------------|--------------|------------|-------------------------|--------------------------------------------------------------|------|
| Cytoplasmic<br>dissimilatory<br>nitrate reduction | <i>narG1</i> | M670_00379 | 330131..333814(3684bp)  | WP_003331056.1 <i>Bacillus azotoformans</i> LMG9581          | 99   |
|                                                   | <i>narH1</i> | M670_00378 | 328591..330141(1551bp)  | WP_003331055.1 <i>Bacillus azotoformans</i> LMG9581          | 99   |
|                                                   | <i>narJ1</i> | M670_00377 | 328056..328604(549bp)   | WP_003331054.1 <i>Bacillus azotoformans</i> LMG9581          | 99   |
|                                                   | <i>narI1</i> | M670_00376 | 327296..328012 (717bp)  | WP_003331053.1 <i>Bacillus azotoformans</i> LMG9581          | 97   |
|                                                   | <i>narJ2</i> | M670_03226 | 120251..120832 (582bp)  | YP_001124780.1 <i>Geobacillus thermodenitrificans</i> NG80-2 | 36   |
|                                                   | <i>narG2</i> | M670_03224 | 15014..118781 (3768bp)  | YP_516567.1 <i>Desulfitobacterium hafniense</i> Y51          | 70   |
|                                                   | <i>narH2</i> | M670_03225 | 118771..120288 (1518bp) | YP_003242070.1 <i>Paenibacillus</i> sp. Y412MC10             | 70   |
|                                                   | <i>narI2</i> | M670_03227 | 120835..121515 (681bp)  | YP_252572.1 <i>Staphylococcus haemolyticus</i> JCSC1435      | 56   |
|                                                   | <i>narJ3</i> | M670_04859 | 10048..10602 (555bp)    | WP_003331449.1 <i>Bacillus azotoformans</i> LMG9581          | 98   |
|                                                   | <i>narH3</i> | M670_04860 | 10048..10602 (1467bp)   | WP_003331450.1 <i>Bacillus azotoformans</i> LMG9581          | 98   |
|                                                   | <i>narI3</i> | M670_04858 | 9362..10051 (690bp)     | WP_003331448.1 <i>Bacillus azotoformans</i> LMG9581          | 100  |
|                                                   | <i>narG3</i> | M670_04861 | 2138..15821(3684bp)     | WP_003331451.1 <i>Bacillus azotoformans</i> LMG9581          | 98   |

| Function                                          | Gene         | Locus Tag  | Gene Coordinates        | GenBank Identifier (pBLAST best hit)                | % ID |
|---------------------------------------------------|--------------|------------|-------------------------|-----------------------------------------------------|------|
| Periplasmic<br>dissimilatory<br>nitrate reduction | <i>napB</i>  | M670_01957 | 102803..103222 (420bp)  | WP_003332435.1 <i>Bacillus azotoformans</i> LMG9581 | 99   |
|                                                   | <i>napG1</i> | M670_01955 | 99581..100177 (597bp)   | WP_003332433.1 <i>Bacillus azotoformans</i> LMG9581 | 99   |
|                                                   | <i>napA</i>  | M670_01956 | 100253..102790 (2538bp) | WP_003332434.1 <i>Bacillus azotoformans</i> LMG9581 | 100  |
|                                                   | <i>napD</i>  | M670_01958 | 103267..103524 (258bp)  | WP_003332436.1 <i>Bacillus azotoformans</i> LMG9581 | 97   |
|                                                   | <i>napG2</i> | M670_01959 | 103530..104099 (570bp)  | WP_003332437.1 <i>Bacillus azotoformans</i> LMG9581 | 99   |
|                                                   | <i>napH</i>  | M670_02517 | 30733..31632 (900bp)    | WP_003332276.1 <i>Bacillus azotoformans</i> LMG9581 | 99   |
|                                                   | <i>moa</i>   | M670_01954 | 98302..99333 (1032bp)   | WP_003332432.1 <i>Bacillus azotoformans</i> LMG9581 | 99   |

| Function                         | Gene        | Locus Tag  | Gene Coordinates      | GenBank Identifier (pBLAST best hit)                | % ID |
|----------------------------------|-------------|------------|-----------------------|-----------------------------------------------------|------|
| Dissimilatory<br>reduction to NO | <i>nirK</i> | M670_01705 | 69499..70560 (1062bp) | WP_003329883.1 <i>Bacillus azotoformans</i> LMG9581 | 99   |

| Function                                          | Gene        | Locus Tag  | Gene Coordinates           | GenBank Identifier (pBLAST best hit)                | % ID |
|---------------------------------------------------|-------------|------------|----------------------------|-----------------------------------------------------|------|
| Dissimilatory<br>nitrite reduction to<br>ammonium | <i>nrfH</i> | M670_01133 | 104203..104718 (516bp)     | WP_003329814.1 <i>Bacillus azotoformans</i> LMG9581 | 100  |
|                                                   | <i>nrfA</i> | M670_01132 | 102744..104201<br>(1458bp) | WP_003329815.1 <i>Bacillus azotoformans</i> LMG9581 | 100  |

| Function                                                       | Gene          | Locus Tag  | Gene Coordinates        | GenBank identifier (pBLAST best hit)                | % ID |
|----------------------------------------------------------------|---------------|------------|-------------------------|-----------------------------------------------------|------|
| Dissimilatory<br>quinol-dependent<br>nitric oxide<br>reduction | <i>qnorB1</i> | M670_01459 | 65358..67619 (2262bp)   | WP_003329195.1 <i>Bacillus azotoformans</i> LMG9581 | 99   |
|                                                                | <i>qnorB2</i> | M670_00384 | 335562..337925 (2364bp) | WP_003331062.1 <i>Bacillus azotoformans</i> LMG9581 | 99   |

|                                                                          |              |            |                       |                                                     |    |
|--------------------------------------------------------------------------|--------------|------------|-----------------------|-----------------------------------------------------|----|
| Dissimilatory menaquinol/cytc-dependent nitric oxide reduction (Type I)  | <i>cbaB1</i> | M670_03526 | 55005..55523 (519bp)  | WP_003330136.1 <i>Bacillus azotoformans</i> LMG9581 | 99 |
|                                                                          | <i>cbaA1</i> | M670_03525 | 53497..54978 (1482bp) | WP_003330135.1 <i>Bacillus azotoformans</i> LMG9581 | 99 |
|                                                                          | <i>senC1</i> | M670_03524 | 52899..53504 (606bp)  | WP_003330134.1 <i>Bacillus azotoformans</i> LMG9581 | 99 |
|                                                                          | <i>cbaD1</i> | M670_03523 | 52309..52872 (564bp)  | WP_003330133.1 <i>Bacillus azotoformans</i> LMG9581 | 88 |
|                                                                          | <i>cbaC2</i> | M670_04975 | 4839..5411 (573bp)    | WP_003330503.1 <i>Bacillus azotoformans</i> LMG9581 | 98 |
| Dissimilatory menaquinol/cytc-dependent nitric oxide reduction (Type II) | <i>senC2</i> | M670_04974 | 4204..4839 (636bp)    | WP_003330502.1 <i>Bacillus azotoformans</i> LMG9581 | 98 |
|                                                                          | <i>cbaB2</i> | M670_04972 | 1938..2399 (462bp)    | WP_003330500.1 <i>Bacillus azotoformans</i> LMG9581 | 96 |
|                                                                          | <i>cbaA2</i> | M670_04973 | 2414..4117 (1704bp)   | WP_003330501.1 <i>Bacillus azotoformans</i> LMG9581 | 94 |

| Function                              | Gene        | Locus Tag  | Gene Coordinates       | GenBank Identifier (pBLAST best hit)                | % ID |
|---------------------------------------|-------------|------------|------------------------|-----------------------------------------------------|------|
| Dissimilatory nitrous oxide reduction | <i>nosF</i> | M670_01450 | 54548..55465 (918bp)   | WP_003329185.1 <i>Bacillus azotoformans</i> LMG9581 | 98   |
|                                       | <i>nosY</i> | M670_01449 | 53709..54551 (843bp)   | WP_003329184.1 <i>Bacillus azotoformans</i> LMG9581 | 99   |
|                                       | <i>nosL</i> | M670_01448 | 53225..53734 (510bp)   | WP_003329183.1 <i>Bacillus azotoformans</i> LMG9581 | 96   |
|                                       | <i>nosD</i> | M670_01447 | 51885..53228 (1344bp)  | WP_003329182.1 <i>Bacillus azotoformans</i> LMG9581 | 96   |
|                                       | <i>nosZ</i> | M670_01444 | 49300..51150 (1851bp)  | WP_003329179.1 <i>Bacillus azotoformans</i> LMG9581 | 99   |
|                                       | <i>nosC</i> | M670_01443 | 48814..49275 (462bp)   | WP_003329178.1 <i>Bacillus azotoformans</i> LMG9581 | 94   |
|                                       | <i>nosC</i> | M670_03087 | 131955..132401 (447bp) | WP_003330275.1 <i>Bacillus azotoformans</i> LMG9581 | 95   |

|             |            |                         |                                                     |     |
|-------------|------------|-------------------------|-----------------------------------------------------|-----|
| <i>nosZ</i> | M670_03086 | 130050..131930 (1881bp) | WP_003330276.1 <i>Bacillus azotoformans</i> LMG9581 | 99  |
| <i>nosD</i> | M670_03084 | 128108..129433 (1326bp) | WP_003330278.1 <i>Bacillus azotoformans</i> LMG9581 | 99  |
| <i>nosD</i> | M670_00060 | 54903..56246 (1344bp)   | WP_003332806.1 <i>Bacillus azotoformans</i> LMG9581 | 100 |
| <i>nosL</i> | M670_00059 | 54421..54906 (486bp)    | WP_003332807.1 <i>Bacillus azotoformans</i> LMG9581 | 99  |
| <i>nosY</i> | M670_00058 | 53550..54380 (831bp)    | WP_003332808.1 <i>Bacillus azotoformans</i> LMG9581 | 97  |
| <i>nosF</i> | M670_00057 | 52814..53560 (747bp)    | WP_003332809.1 <i>Bacillus azotoformans</i> LMG9581 | 97  |
| <i>nosL</i> | M670_00056 | 51729..52448 (720bp)    | WP_003332811.1 <i>Bacillus azotoformans</i> LMG9581 | 97  |
| <i>nosC</i> | M670_00026 | 24574..25008 (435bp)    | WP_003332840.1 <i>Bacillus azotoformans</i> LMG9581 | 99  |
| <i>nosZ</i> | M670_00025 | 22681..24558 (1878bp)   | WP_003332841.1 <i>Bacillus azotoformans</i> LMG9581 | 100 |
| <i>nosD</i> | M670_00023 | 20637..22052 (1416bp)   | WP_003332843.1 <i>Bacillus azotoformans</i> LMG9581 | 99  |
| <i>nosY</i> | M670_00022 | 19840..20637 (798bp)    | WP_003332844.1 <i>Bacillus azotoformans</i> LMG9581 | 100 |
| <i>nosF</i> | M670_00021 | 19172..19843 (672bp)    | WP_003332845.1 <i>Bacillus azotoformans</i> LMG9581 | 100 |

---

| Function                    | Gene        | Locus Tag  | Gene Coordinates        | GenBank identifier (pBLAST best hit)              | % ID |
|-----------------------------|-------------|------------|-------------------------|---------------------------------------------------|------|
| Nitrate/Nitrite transporter | <i>narK</i> | M670_03223 | 113794..115014 (1221bp) | WP_019240754.1 <i>Bacillus massilianorexius</i>   | 75   |
|                             | <i>nirC</i> | M670_04679 | 22520..23290 (771bp)    | WP_003331452 <i>Bacillus azotoformans</i> LMG9581 | 97   |

---

**Table S2.** Overview of the genomic inventory for enzymatic reduction of O<sub>2</sub> and ATP synthase in *Bacillus azotoformans* MEV2011 (according to the IMG autoannotation). Genes encoding complex I-IV in the electron transport chain and an ATPase were identified. In addition, genes were found encoding an alternative terminal oxidase.

| Locus Tag         | Gene Product Name                                         | Gene Coordinates         | pBLAST best hit                                     |
|-------------------|-----------------------------------------------------------|--------------------------|-----------------------------------------------------|
| <b>Complex I</b>  |                                                           |                          | <b>GenBank Identifier</b>                           |
|                   |                                                           |                          | <b>%ID</b>                                          |
| M670_02616        | NADH dehydrogenase subunit A [EC: 1.6.5.3]                | 119047...119421 (375bp)  | WP_003333358.1 <i>Bacillus azotoformans</i> LMG9581 |
| M670_02617        | NADH dehydrogenase subunit B [EC: 1.6.5.3]                | 119412...119933 (522bp)  | WP_003333357.1 <i>Bacillus azotoformans</i> LMG9581 |
| M670_02618        | NADH dehydrogenase subunit C [EC: 1.6.5.3]                | 119961...121145 (1185bp) | WP_003333355.1 <i>Bacillus azotoformans</i> LMG9581 |
| M670_02619        | NADH dehydrogenase subunit D [EC: 1.6.5.3]                | 121149...122252 (1104bp) | WP_003333354.1 <i>Bacillus azotoformans</i> LMG9581 |
| M670_02620        | NADH dehydrogenase subunit H [EC: 1.6.5.3]                | 122252...123256 (1005bp) | WP_017756590.1 <i>Bacillus</i> sp. ZYK              |
| M670_02621        | NADH dehydrogenase subunit I [EC: 1.6.5.3]                | 123299...123718 (420bp)  | WP_003333353.1 <i>Bacillus azotoformans</i> LMG9581 |
| M670_02622        | NADH dehydrogenase subunit J [EC: 1.6.5.3]                | 123715...124230 (516bp)  | WP_003333352.1 <i>Bacillus azotoformans</i> LMG9581 |
| M670_02623        | NADH dehydrogenase subunit K [EC: 1.6.5.3]                | 124223...124537 (315bp)  | WP_003333351.1 <i>Bacillus azotoformans</i> LMG9581 |
| M670_02624        | NADH dehydrogenase subunit L [EC: 1.6.5.3]                | 124556...126454 (1899bp) | WP_003333350.1 <i>Bacillus azotoformans</i> LMG9581 |
| M670_02625        | NADH dehydrogenase subunit M [EC: 1.6.5.3]                | 126451...127959 (1509bp) | WP_003333349.1 <i>Bacillus azotoformans</i> LMG9581 |
| M670_02626        | NADH dehydrogenase subunit N [EC: 1.6.5.3]                | 127966...19486 (1521bp)  | WP_003333348.1 <i>Bacillus azotoformans</i> LMG9581 |
| M670_00090        | NADH dehydrogenase, FAD-containing subunit [EC: 1.6.99.3] | 77922...79145 (1224bp)   | WP_003332777.1 <i>Bacillus azotoformans</i> LMG9581 |
| <b>Complex II</b> |                                                           |                          | <b>GenBank Identifier</b>                           |
|                   |                                                           |                          | <b>%ID</b>                                          |
| M670_01296        | succinate dehydrogenase subunit B [EC: 1.3.99.1]          | 268315...269070 (756bp)  | WP_003331006.1 <i>Bacillus azotoformans</i> LMG9581 |
| M670_01297        | succinate dehydrogenase subunit A [EC: 1.3.99.1]          | 269073...270863 (1791bp) | WP_003331007.1 <i>Bacillus azotoformans</i> LMG9581 |
| M670_01298        | succinate dehydrogenase subunit C [EC: 1.3.5.1]           | 271108..271737 (630bp)   | WP_003331008.1 <i>Bacillus azotoformans</i> LMG9581 |

| Locus Tag          | Gene Product Name                                        | Gene Coordinates        | pBLAST best hit                                              |
|--------------------|----------------------------------------------------------|-------------------------|--------------------------------------------------------------|
| <b>Complex III</b> |                                                          |                         | <b>GenBank Identifier</b> <b>%ID</b>                         |
| M670_00552         | menaquinol-cytochrome c reductase cytochrome b/c subunit | 458363...459136 (774bp) | WP_003331133.1 <i>Bacillus azotoformans</i> LMG9581      100 |
| M670_00553         | menaquinol-cytochrome c reductase cytochrome b subunit   | 459168...459842 (675bp) | WP_003331134.1 <i>Bacillus azotoformans</i> LMG9581      100 |
| M670_00554         | Rieske Fe-S protein [EC: 1.10.2.-]                       | 459857...460354 (498bp) | WP_003331135.1 <i>Bacillus azotoformans</i> LMG9581      99  |

| Locus Tag                                 | Gene Product Name                                                    | Gene Coordinates     | pBLAST best hit                                              |
|-------------------------------------------|----------------------------------------------------------------------|----------------------|--------------------------------------------------------------|
| <b>Complex IV ( cytochrome c oxidase)</b> |                                                                      |                      | <b>GenBank Identifier</b> <b>%ID</b>                         |
| M670_04800                                | cytochrome c oxidase assembly factor CtaG                            | 3158...4060 (903bp)  | WP_003329986.1 <i>Bacillus azotoformans</i> LMG9581      95  |
| M670_04801                                | cytochrome c oxidase, subunit IVB [EC: 1.9.3.1]                      | 4101...4433 (333bp)  | WP_003329987.1 <i>Bacillus azotoformans</i> LMG9581      99  |
| M670_04802                                | Heme/copper-type cytochrome/quinol oxidase, subunit 3 [EC: 1.9.3.1]  | 4439...5059 (621bp)  | WP_003329988.1 <i>Bacillus azotoformans</i> LMG9581      100 |
| M670_04803                                | Heme/copper-type cytochrome/quinol oxidases, subunit 1 [EC: 1.9.3.1] | 5059...6930 (1872bp) | WP_003329990.1 <i>Bacillus azotoformans</i> LMG9581      99  |
| M670_04804                                | cytochrome c oxidase, subunit II [EC: 1.9.3.1]                       | 6947...7990 (1044bp) | WP_003329991.1 <i>Bacillus azotoformans</i> LMG9581      99  |
| M670_04805                                | cyoE protoheme IX farnesyltransferase [EC:2.5.1.-]                   | 8424...9167(744bp)   | WP_003329992.1 <i>Bacillus azotoformans</i> LMG9581      99  |

| Locus Tag                                        | Gene Product Name                                                | Gene Coordinates       | pBLAST best hit                                              |
|--------------------------------------------------|------------------------------------------------------------------|------------------------|--------------------------------------------------------------|
| <b>Complex IV (alternative terminal oxidase)</b> |                                                                  |                        | <b>GenBank Identifier</b> <b>%ID</b>                         |
| M670_01069                                       | cytochrome aa3-600 menaquinol oxidase subunit IV [EC:1.10.3.12]  | 49816...50109 (294bp)  | WP_003331328.1 <i>Bacillus azotoformans</i> LMG9581      98  |
| M670_01068                                       | cytochrome aa3-600 menaquinol oxidase subunit III [EC:1.10.3.12] | 49217...49813 (597bp)  | WP_003331327.1 <i>Bacillus azotoformans</i> LMG9581      100 |
| M670_01067                                       | cytochrome aa3-600 menaquinol oxidase subunit I [EC:1.10.3.12]   | 47268...49217 (1950bp) | WP_003331326.1 <i>Bacillus azotoformans</i> LMG9581      99  |
| M670_01066                                       | cytochrome aa3-600 menaquinol oxidase subunit II [EC:1.10.3.12]  | 46351...47265 (915bp)  | WP_003331325.1 <i>Bacillus azotoformans</i> LMG9581      98  |

| Locus Tag  | Gene Product Name                                                       | Gene Coordinates         | pBLAST best hit                                         |
|------------|-------------------------------------------------------------------------|--------------------------|---------------------------------------------------------|
|            | ATPase                                                                  |                          | GenBank Identifier      %ID                             |
| M670_04237 | ppk polyphosphate kinase [EC:2.7.4.1]                                   | 21328...23442 (2115bp)   | WP_003330039.1 <i>Bacillus azotoformans</i> LMG9581 99  |
| M670_00299 | pyrophosphatase PpaX [EC:3.6.1.1]                                       | 247358...248005 (648bp)  | WP_003330763.1 <i>Bacillus azotoformans</i> LMG9581 99  |
| M670_02607 | atpB F-type H <sup>+</sup> -transporting ATPase subunit a [EC:3.6.3.14] | 111451...112161 (711bp)  | WP_003333362.1 <i>Bacillus azotoformans</i> LMG9581 99  |
| M670_02608 | ATP synthase F0 subcomplex C subunit [EC:3.6.3.14]                      | 112216...112434 (219bp)  | WP_003333365.1 <i>Bacillus azotoformans</i> LMG9581 100 |
| M670_02609 | ATP synthase F0 subcomplex B subunit [EC:3.6.3.14]                      | 112693...113223 (531bp)  | WP_003333364.1 <i>Bacillus azotoformans</i> LMG9581 100 |
| M670_02610 | ATP synthase F1 subcomplex delta subunit [EC:3.6.3.14]                  | 113220...113765 (546bp)  | WP_003333363.1 <i>Bacillus azotoformans</i> LMG9581 100 |
| M670_02611 | ATP synthase F1 subcomplex alpha subunit [EC:3.6.3.14]                  | 113783...115291 (1509bp) | WP_003333362.1 <i>Bacillus azotoformans</i> LMG9581 100 |
| M670_02612 | ATP synthase F1 subcomplex gamma subunit [EC:3.6.3.14]                  | 115374...115234 (861bp)  | WP_003333361.1 <i>Bacillus azotoformans</i> LMG9581 99  |
| M670_02613 | ATP synthase F1 subcomplex beta subunit [EC:3.6.3.14]                   | 116337...117749 (1413bp) | WP_003333360.1 <i>Bacillus azotoformans</i> LMG9581 99  |
| M670_02615 | ATP synthase F1 subcomplex epsilon subunit [EC:3.6.3.14]                | 117977...118378 (402bp)  | WP_003333359.1 <i>Bacillus azotoformans</i> LMG9581 99  |
| M670_00902 | type III secretion system ATPase, FliI/YscN [EC: 3.6.3.15]              | 272821...274131 (1311bp) | WP_003332537.1 <i>Bacillus azotoformans</i> LMG9581 99  |

**Table S3.** Overview of the genomic inventory for the detoxification of reactive oxygen species in *Bacillus azotoformans* MEV2011 (according to the IMG autoannotation).

| Locus Tag  | Gene Product Name                                                 | Gene Coordinates        | pBLAST best hit                                 |
|------------|-------------------------------------------------------------------|-------------------------|-------------------------------------------------|
|            |                                                                   |                         | GenBank Identifier      %ID                     |
| M670_04927 | SOD2 superoxide dismutase, Fe-Mn family [EC:1.15.1.1]             | 11018...11629 (612bp)   | WP_003332388.1 <i>Bacillus azotoformans</i> 100 |
| M670_01567 | Cu <sup>2+</sup> /Zn <sup>2+</sup> superoxide dismutase SOD1      | 156379...157017 (639bp) | WP_003331991.1 <i>Bacillus azotoformans</i> 99  |
| M670_01373 | tpx thiol peroxidase, atypical 2-Cys peroxiredoxin [EC:1.11.1.15] | 346493...34993 (501bp)  | WP_003347404.1 <i>Bacillus methanolicus</i> 86  |
| M670_04941 | glutathione peroxidase [EC:1.11.1.9]                              | 6177...6740 (564bp)     | WP_003331960.1 <i>Bacillus azotoformans</i> 97  |
| M670_00605 | Mn-containing catalase                                            | 503460..504029 (570bp)  | WP_017755616.1 <i>Bacillus</i> sp. ZYK 91       |
